# Supplementary material
Source: PubMed Central journal article supplement (PMC2777108)

**S1. Control cells show MT repolymerization after nocodazole treatment.**

Representative COS-7 cell transfected with EMTB-GFP, a MT marker, incubated with nocodazole, washed out, and immediately imaged for 20 minutes at 1 frame/20seconds. EMTB-marked MTs emanate from 2 MTOC asters very quickly and MTs repopulate the entire cell within 10 minutes.

**S2. Control cells show MT repolymerization after nocodazole treatment.**

Representative COS-7 cell transfected with EMTB-GFP, a MT marker, and empty pmCerulean vector incubated with nocodazole, washed out, and immediately imaged for 20 minutes at 1 frame/20seconds. EMTB-marked MTs emanate from 2 MTOC asters very quickly and MTs repopulate the entire cell within 10 minutes.

**S3. NT-CENP-F transfection blocks MT repolymerization after nocodazole treatment.**

Representative COS-7 cell co-transfected with NT-CENP-F (not shown) and EMTB-GFP, a MT marker, incubated with nocodazole, washed out, and immediately imaged for 20 minutes at 1 frame/20seconds. The EMTB-GFP pool remains cytoplasmic throughout the 20 minute period in the cell expressing NT-CENP-F. After imaging, other WT cells in the dish were checked and showed full MTOC recovery (not shown).

**S4. Inhibited MT nucleation is not a permanent condition, but significant.**

(A-C) COS-7 cells transfected with (A) NT-CENP-F-GFP and labeled for (B) tubulin show full MT repolymerization in 2 hours after nocodazole washout. (D, E) CENP-F<sup>-/-</sup> MEFs show weak MT repolymerization 6 hours after nocodazole washout.

**S5. Some centrosomal proteins are not redistributed by expression of NT-CENP-F.**

COS-7 cells expressing NT-CENP-F do not show co-localization of the CENP-F truncation puncta with endogenous  $\gamma$ -tubulin, pericentrin, or centrin1. (A) NT-CENP-F-GFP, (B)  $\gamma$ -tubulin, (C) merge. (D) NT-CENP-F-GFP, (E) pericentrin, (F) merge. (G) NT-CENP-F-GFP, (H) centrin1, (I) merge. (J-R) WT and CENP-F<sup>-/-</sup> MEFs were labeled for Hook2 and ninein (red) and  $\gamma$ -tubulin (green). (M, O, P, R) Both Hook2 and ninein retain centrosomal localization in CENP-F<sup>-/-</sup> MEFs.

Scale bars 10  $\mu$ m.

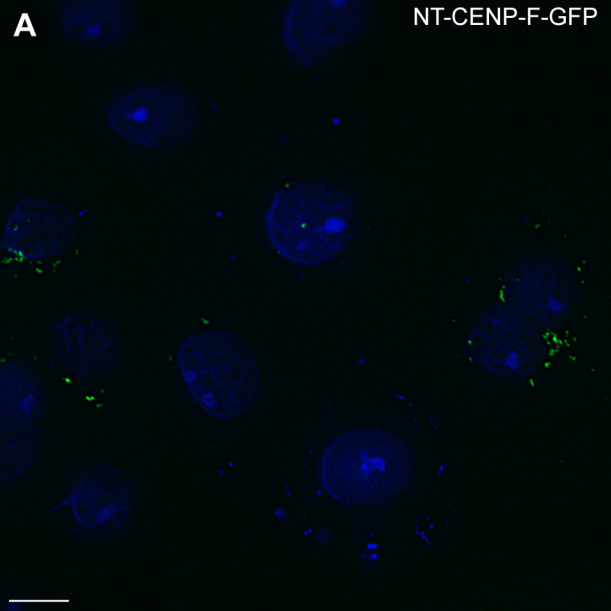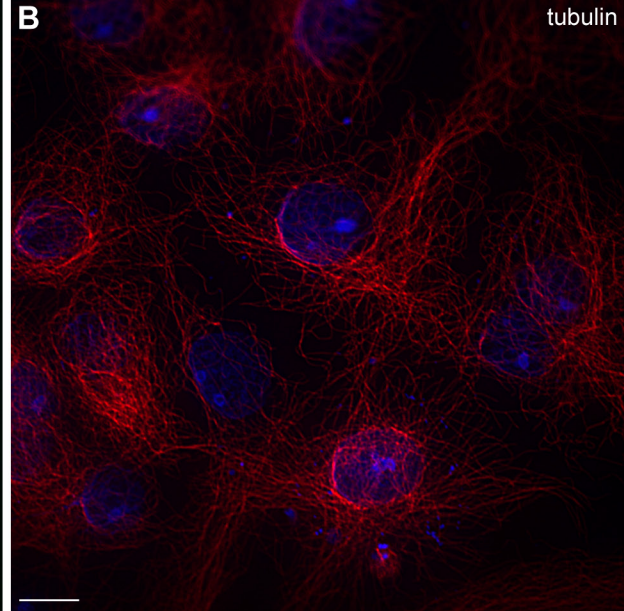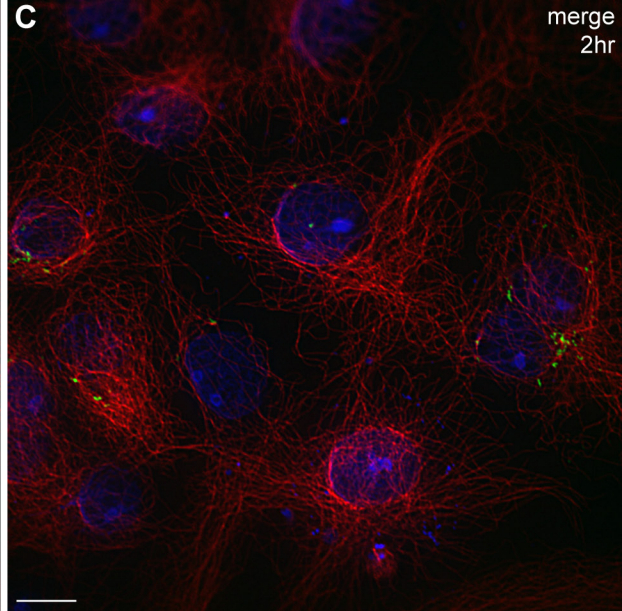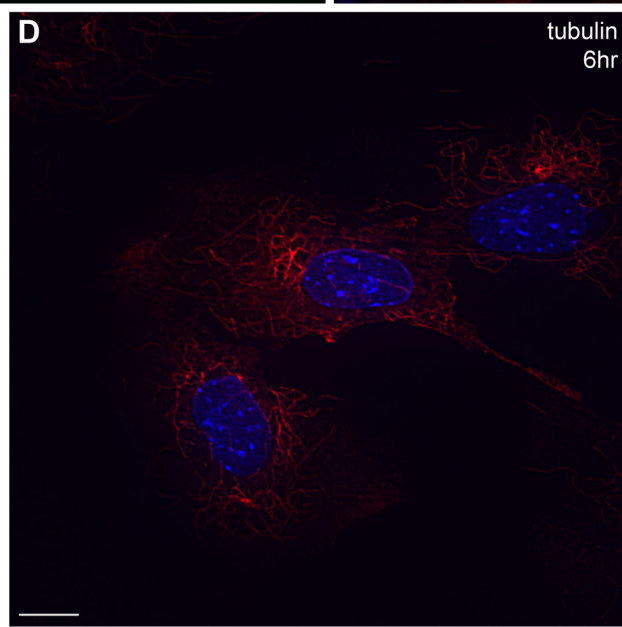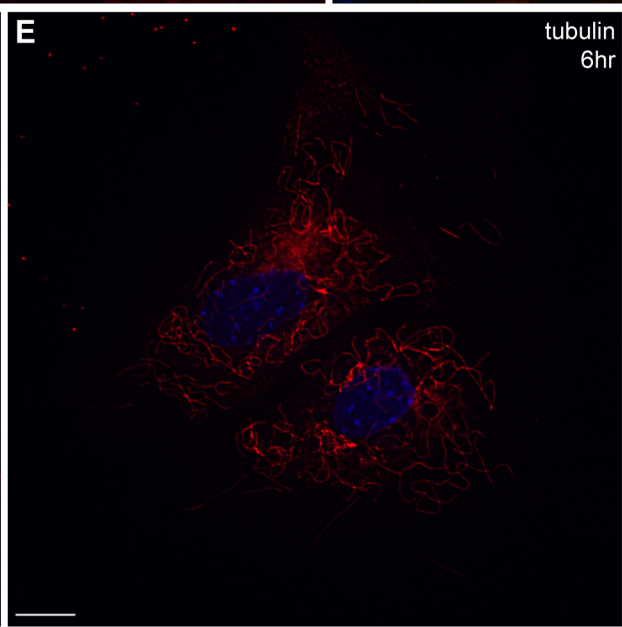

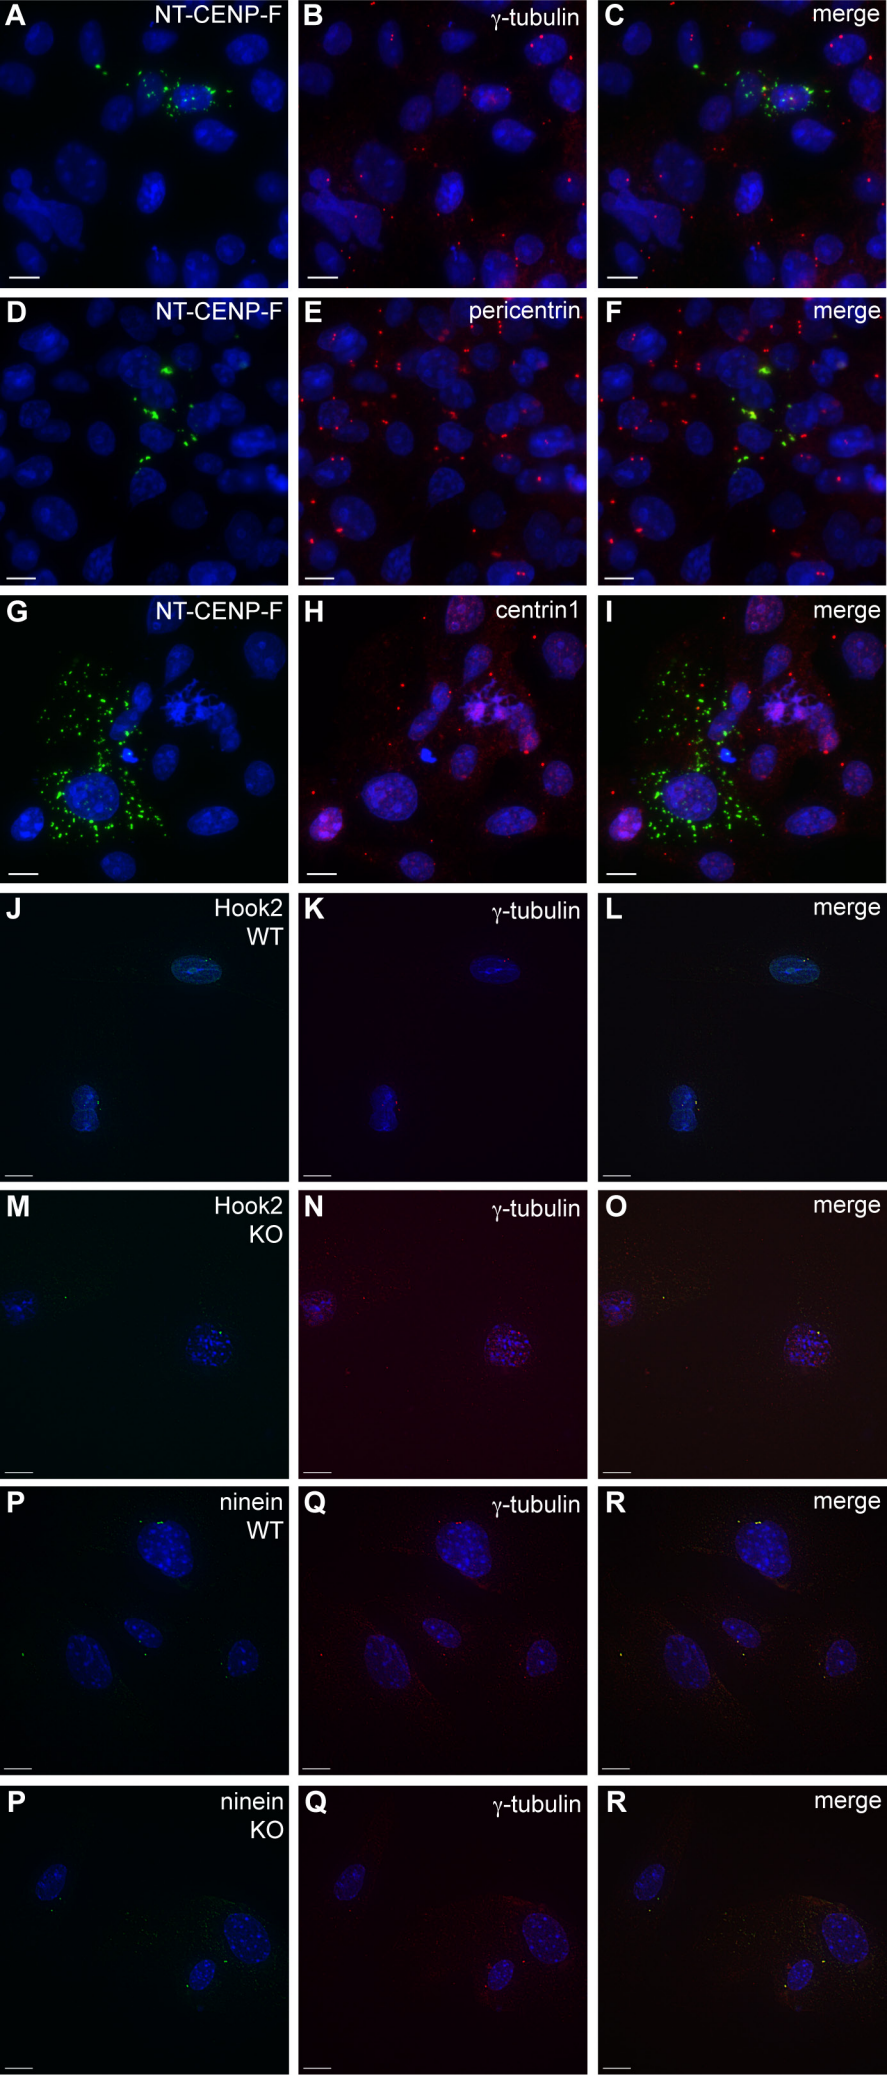

Supplement: E09-07-0560_1.pdf [file E09-07-0560_1.pdf]
